# Supplementary material for: Au(i) N-heterocyclic carbenes from bis-imidazolium amphiphiles: synthesis, cytotoxicity and incorporation onto gold nanoparticles
Source: Royal Society of Chemistry journal article supplement (doi:10.1039/c5ra21621d), 2015-12-22
Supplement: c5ra21621d1.pdf [file c5ra21621d1.pdf]

Electronic Supporting Information (ESI) available:

## Au(I) *N*-heterocyclic carbenes from bis-imidazolium amphiphiles: synthesis, cytotoxicity and incorporation onto gold nanoparticles

M. Rodrigues,<sup>a</sup> L. Russo,<sup>a</sup> E. Aguiló,<sup>b</sup> L. Rodríguez,<sup>b</sup> I. Ott<sup>c</sup> and L. Pérez-García<sup>a1\*</sup>

<sup>1</sup> Departament de Farmacologia i Química Terapèutica i Institut de Nanociència i Nanotecnologia UB (IN2UB), Universitat de Barcelona, Avda. Joan XXIII s/n, 08028 Barcelona, Spain

<sup>2</sup> Departament de Química Inorgànica, Universitat de Barcelona, C/ Martí i Franquès 1-11, 08028 Barcelona, Spain

<sup>3</sup> Institute of Medicinal and Pharmaceutical Chemistry, Technische Universität Braunschweig, Beethovenstr. 55, 38106 Braunschweig

\*Corresponding author:

Dr. Lluïsa Pérez-García

mlperez@ub.edu

Telephone: (+34) 934035849

Fax: (+34) 934024539

<sup>1</sup> Present address:

School of Pharmacy

The University of Nottingham

University Park

Nottingham NG72RD

England, UK

|               |           |             |          |                 |               |                        |                     |
|---------------|-----------|-------------|----------|-----------------|---------------|------------------------|---------------------|
| Sample Name   | EM4376    | Position    | P1-C6    | Instrument Name | Instrument 1  | User Name              |                     |
| Inj Vol       | 0.2       | InjPosition |          | SampleType      | Sample        | IRM Calibration Status | Success             |
| Data Filename | MSD3506.d | ACQ Method  | ESIpos.m | Comment         | LR12 (LRusso) | Acquired Time          | 3/1/2013 3:11:28 PM |

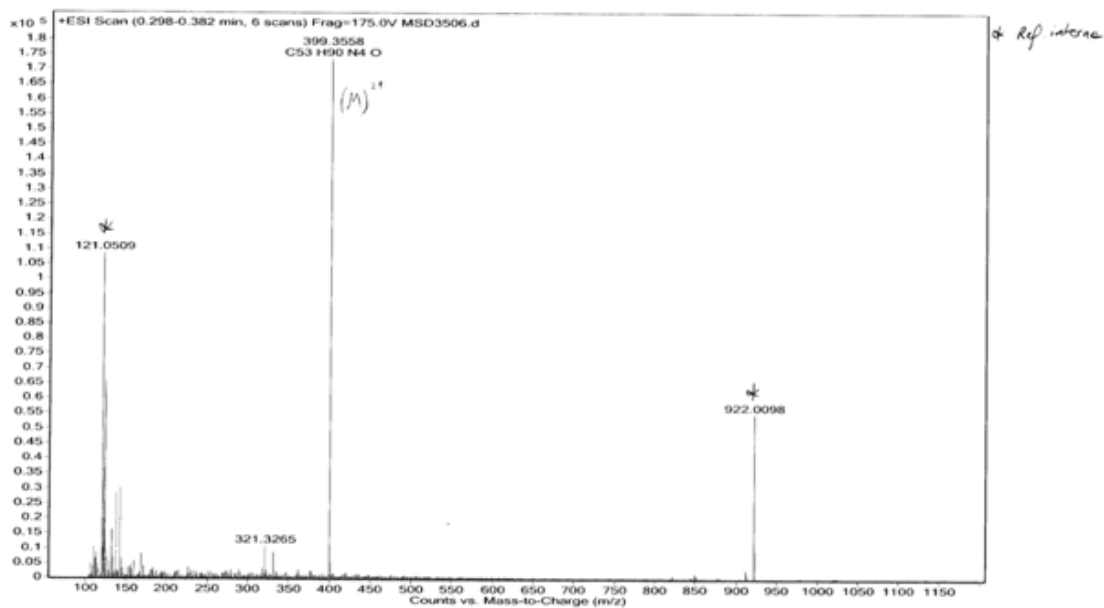

Figure S1: ESI-MS spectrum of **2**

|               |           |             |          |                 |                    |                        |                       |
|---------------|-----------|-------------|----------|-----------------|--------------------|------------------------|-----------------------|
| Sample Name   | EM9352    | Position    | P1-A3    | Instrument Name | Instrument 1       | User Name              |                       |
| Inj Vol       | 0.2       | InjPosition |          | SampleType      | Sample             | IRM Calibration Status | Success               |
| Data Filename | MSD0103.d | ACQ Method  | ESIpos.m | Comment         | LR37 (AMRodrigues) | Acquired Time          | 2/27/2015 11:07:18 AM |

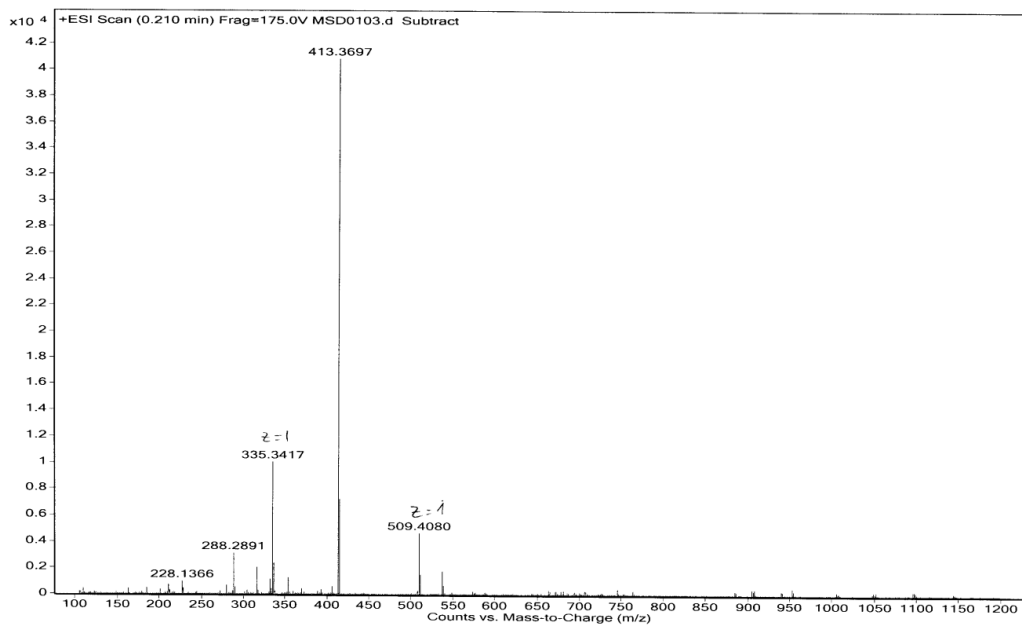

Figure S2: ESI-MS spectrum of **3**.

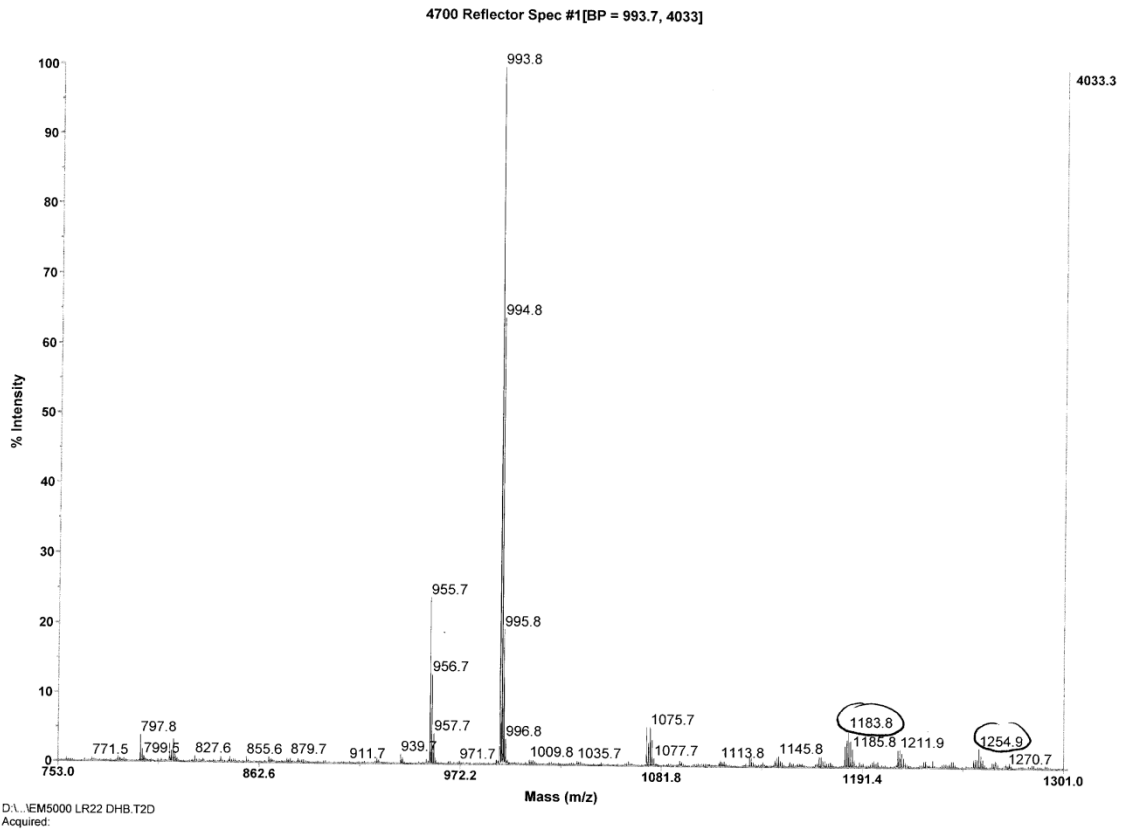

Figure S3 – MALDI-TOF MS spectrum of 4 with DHB as matrix.

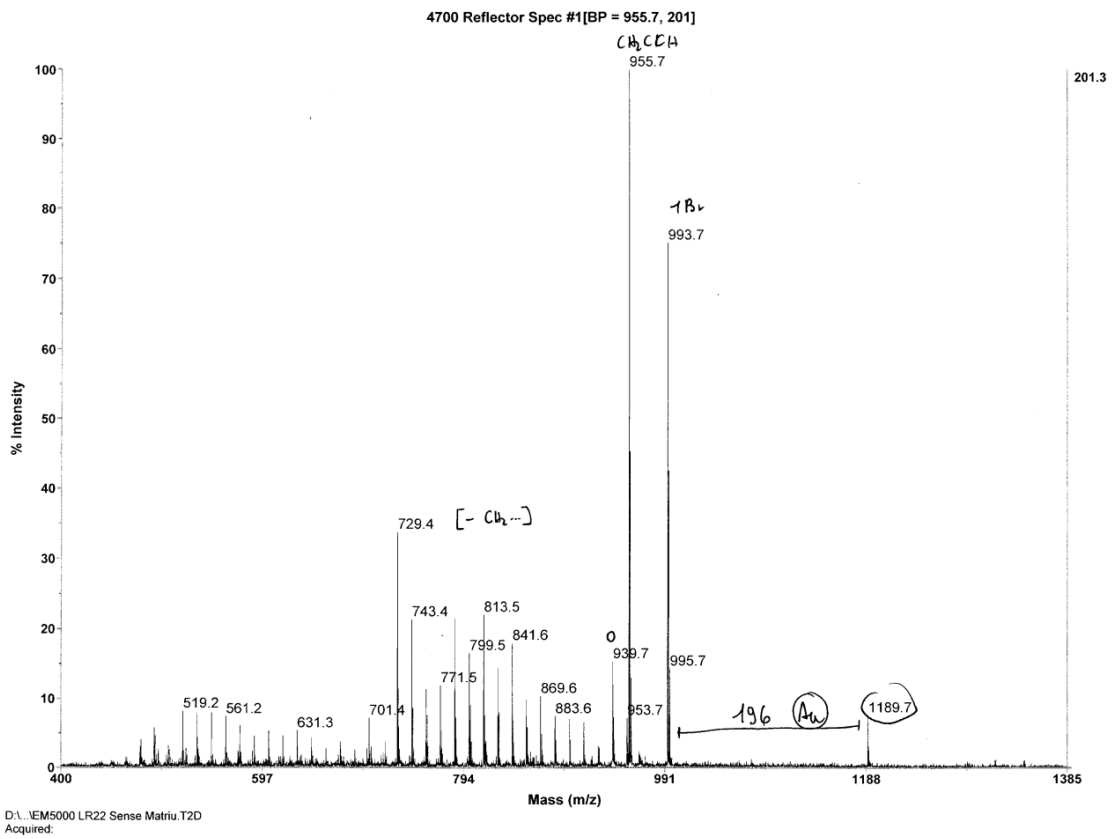

Figure S4 - MALDI-TOF MS spectrum of 4 with no matrix.

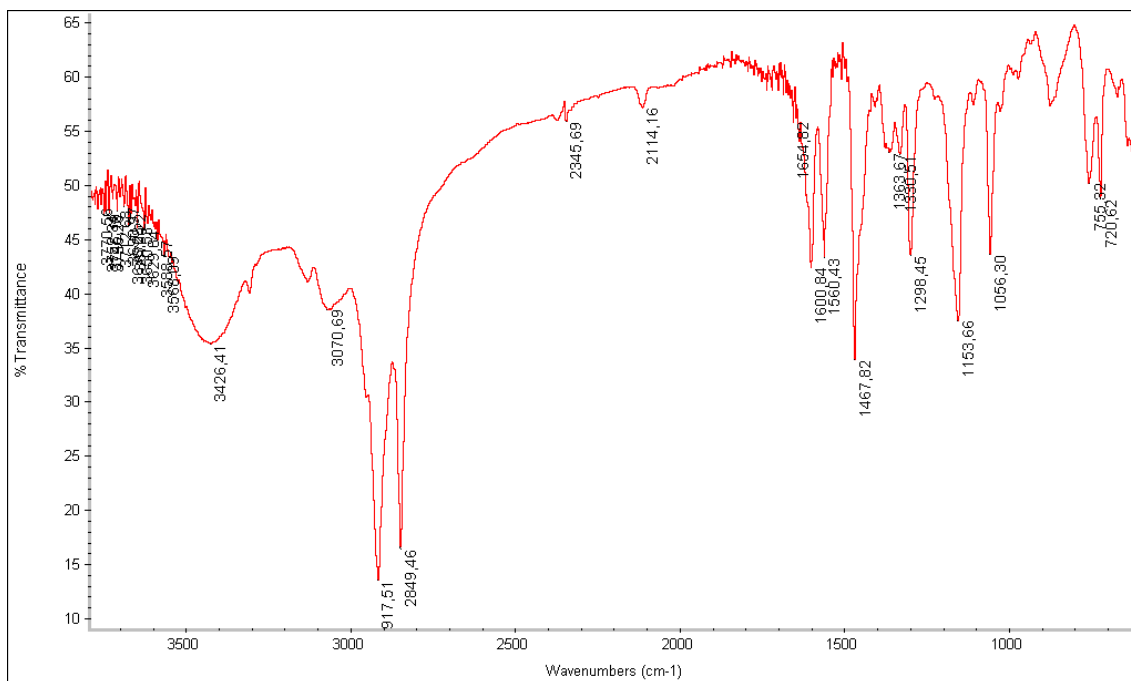

Figure S5 – IR spectrum of **2**.

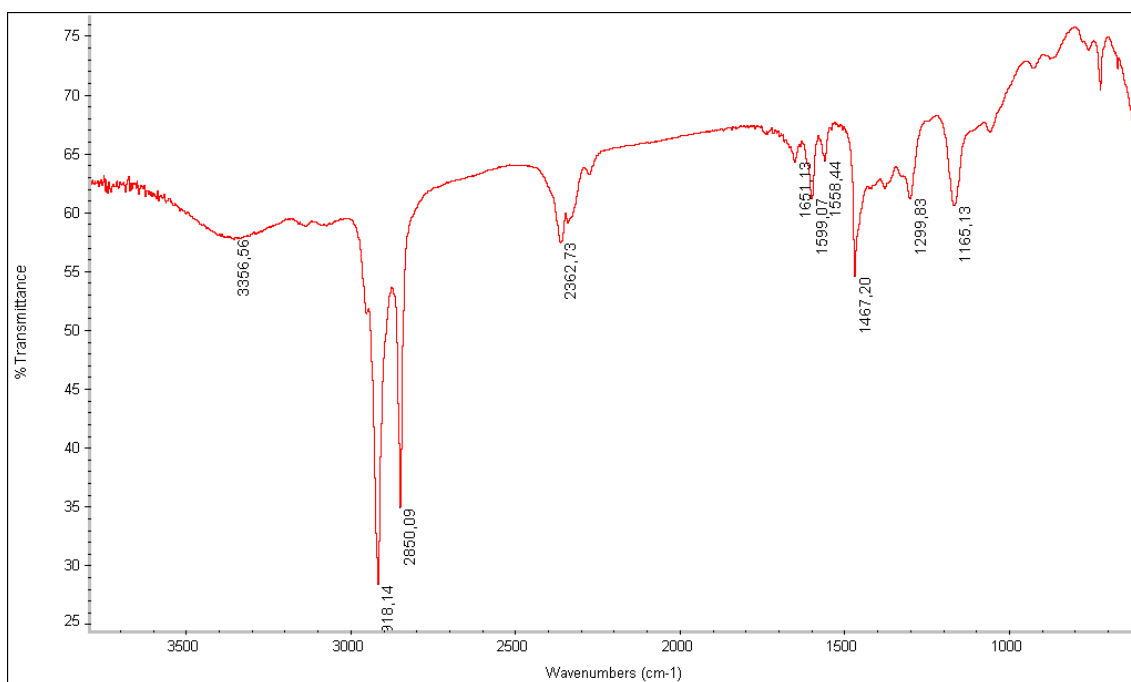

Figure S6 - IR spectrum of **2-AuNP**.

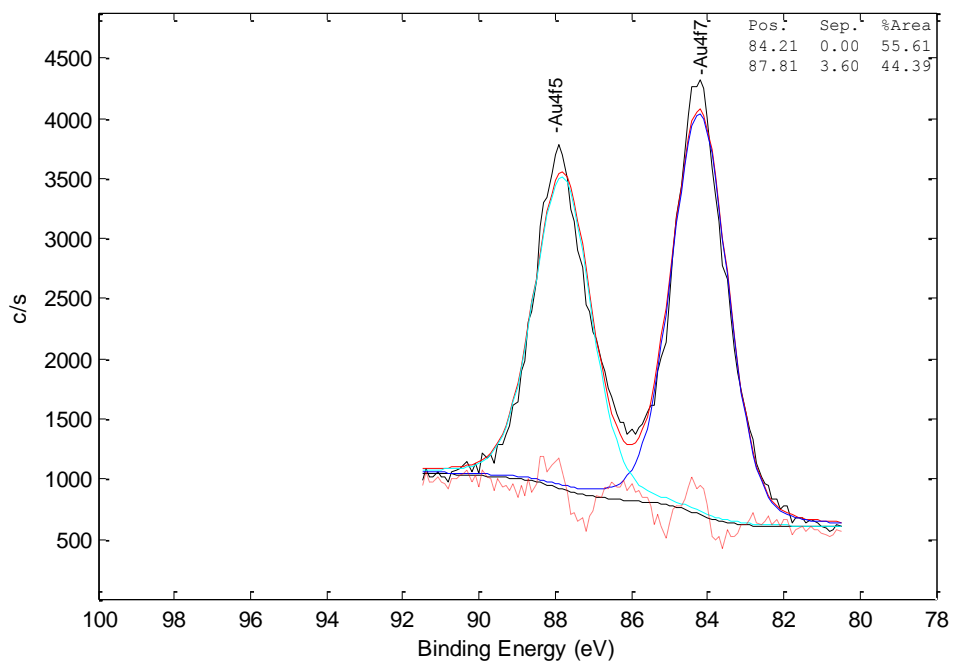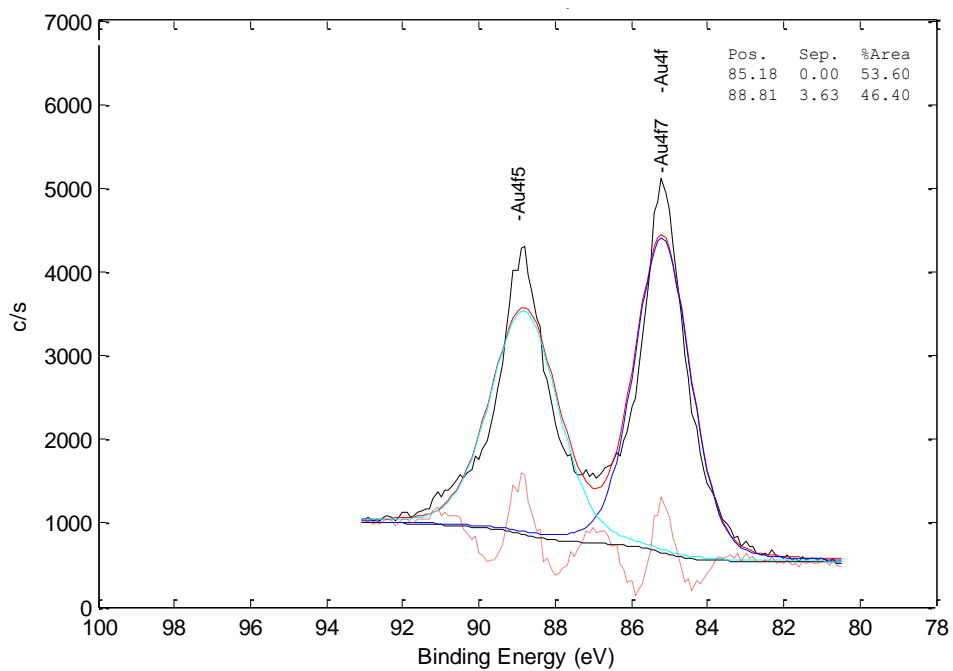

Figure S7: XPS spectrum, with curve fit, of **2-AuNP** (top) and **3-AuNP** (bottom) showing the Au  $4f_{7/2}$  and  $4f_{5/2}$  peaks with binding energies of 84.2 eV and 87.8 eV (**2-AuNP**), and 85.2 and 88.8 eV (**3-AuNP**) respectively.

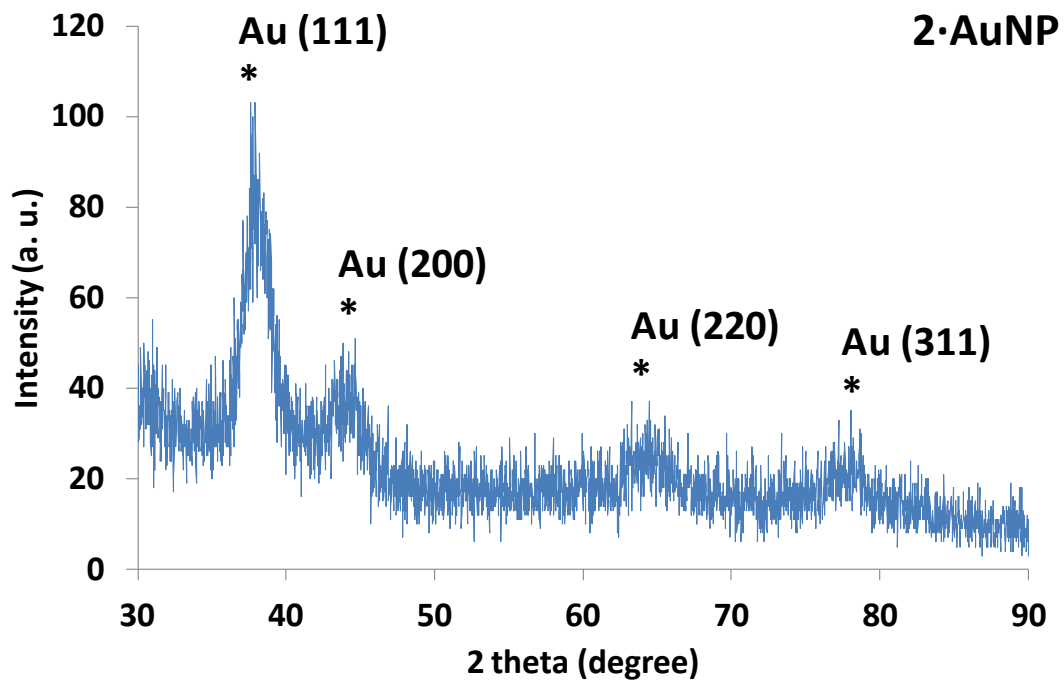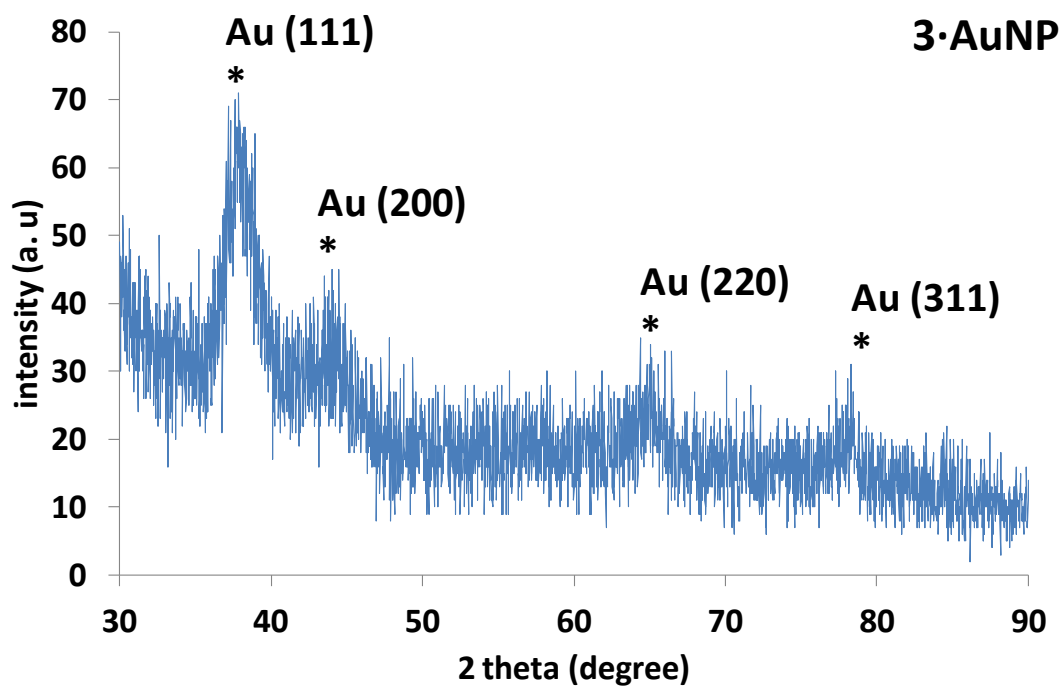

Figure S8: XRD of **2-AuNP** (top) and **3-AuNP** (bottom) showing the Bragg peaks at 37°, 44°, 65° and 78°, corresponding to (111), (200), (220) and (311) planes respectively.

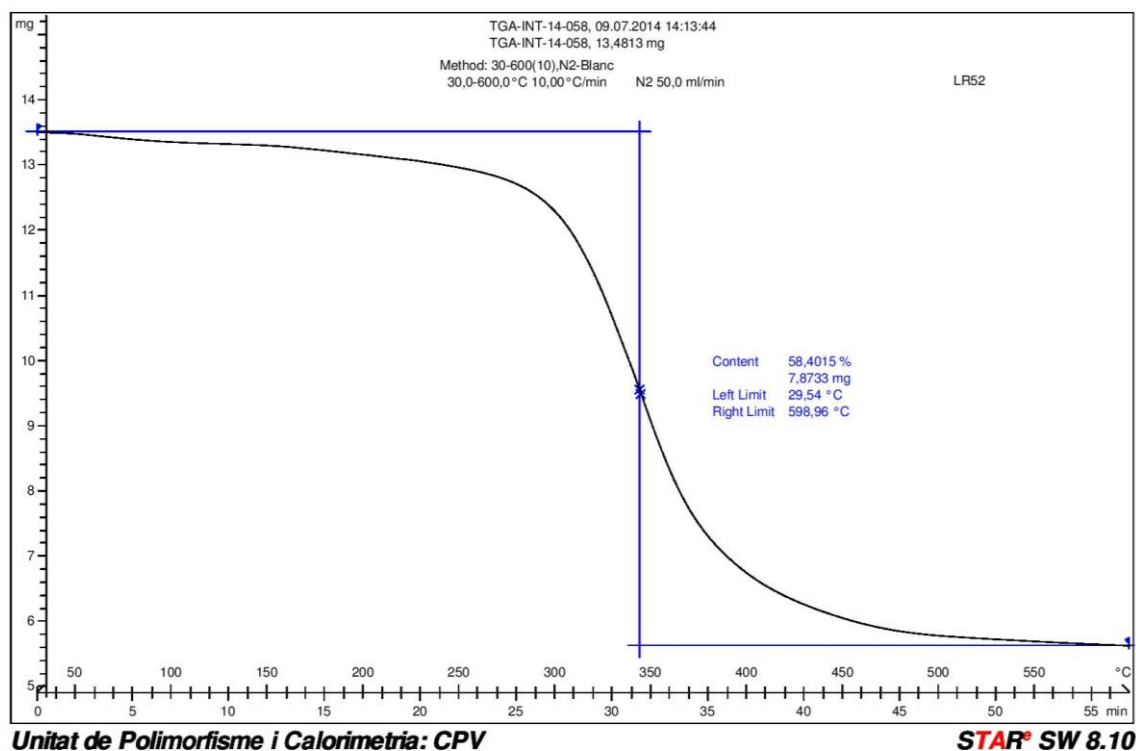

Figure S9 – Thermogravimetric analysis curve of **2-AuNP**.

Table S1

Thermogravimetry results and calculations of amount of ligand per NP and per area of NP surface based on the ratio of ligand to gold present in the GNP and their gold core size obtained by TEM.

| Sample        | Total mass (mg) | Ligand mass (mg) | Ligand: Au (mmol) | Average diameter (nm) | Moles Au/NP              | Ligand/NP | Ligand/nm <sup>2</sup> |
|---------------|-----------------|------------------|-------------------|-----------------------|--------------------------|-----------|------------------------|
| <b>2-AuNP</b> | 13.4813         | 7.8733           | 0.34599           | 7.0                   | $1.7597 \times 10^{-20}$ | 3653      | <b>23.73</b>           |
